# Supplementary figures and images for: Salt Water Exposure Exacerbates the Negative Response of Phragmites australis Haplotypes to Sea-Level Rise
Source: MDPI journal article supplement (doi:10.3390/plants13060906), 2024-03-21

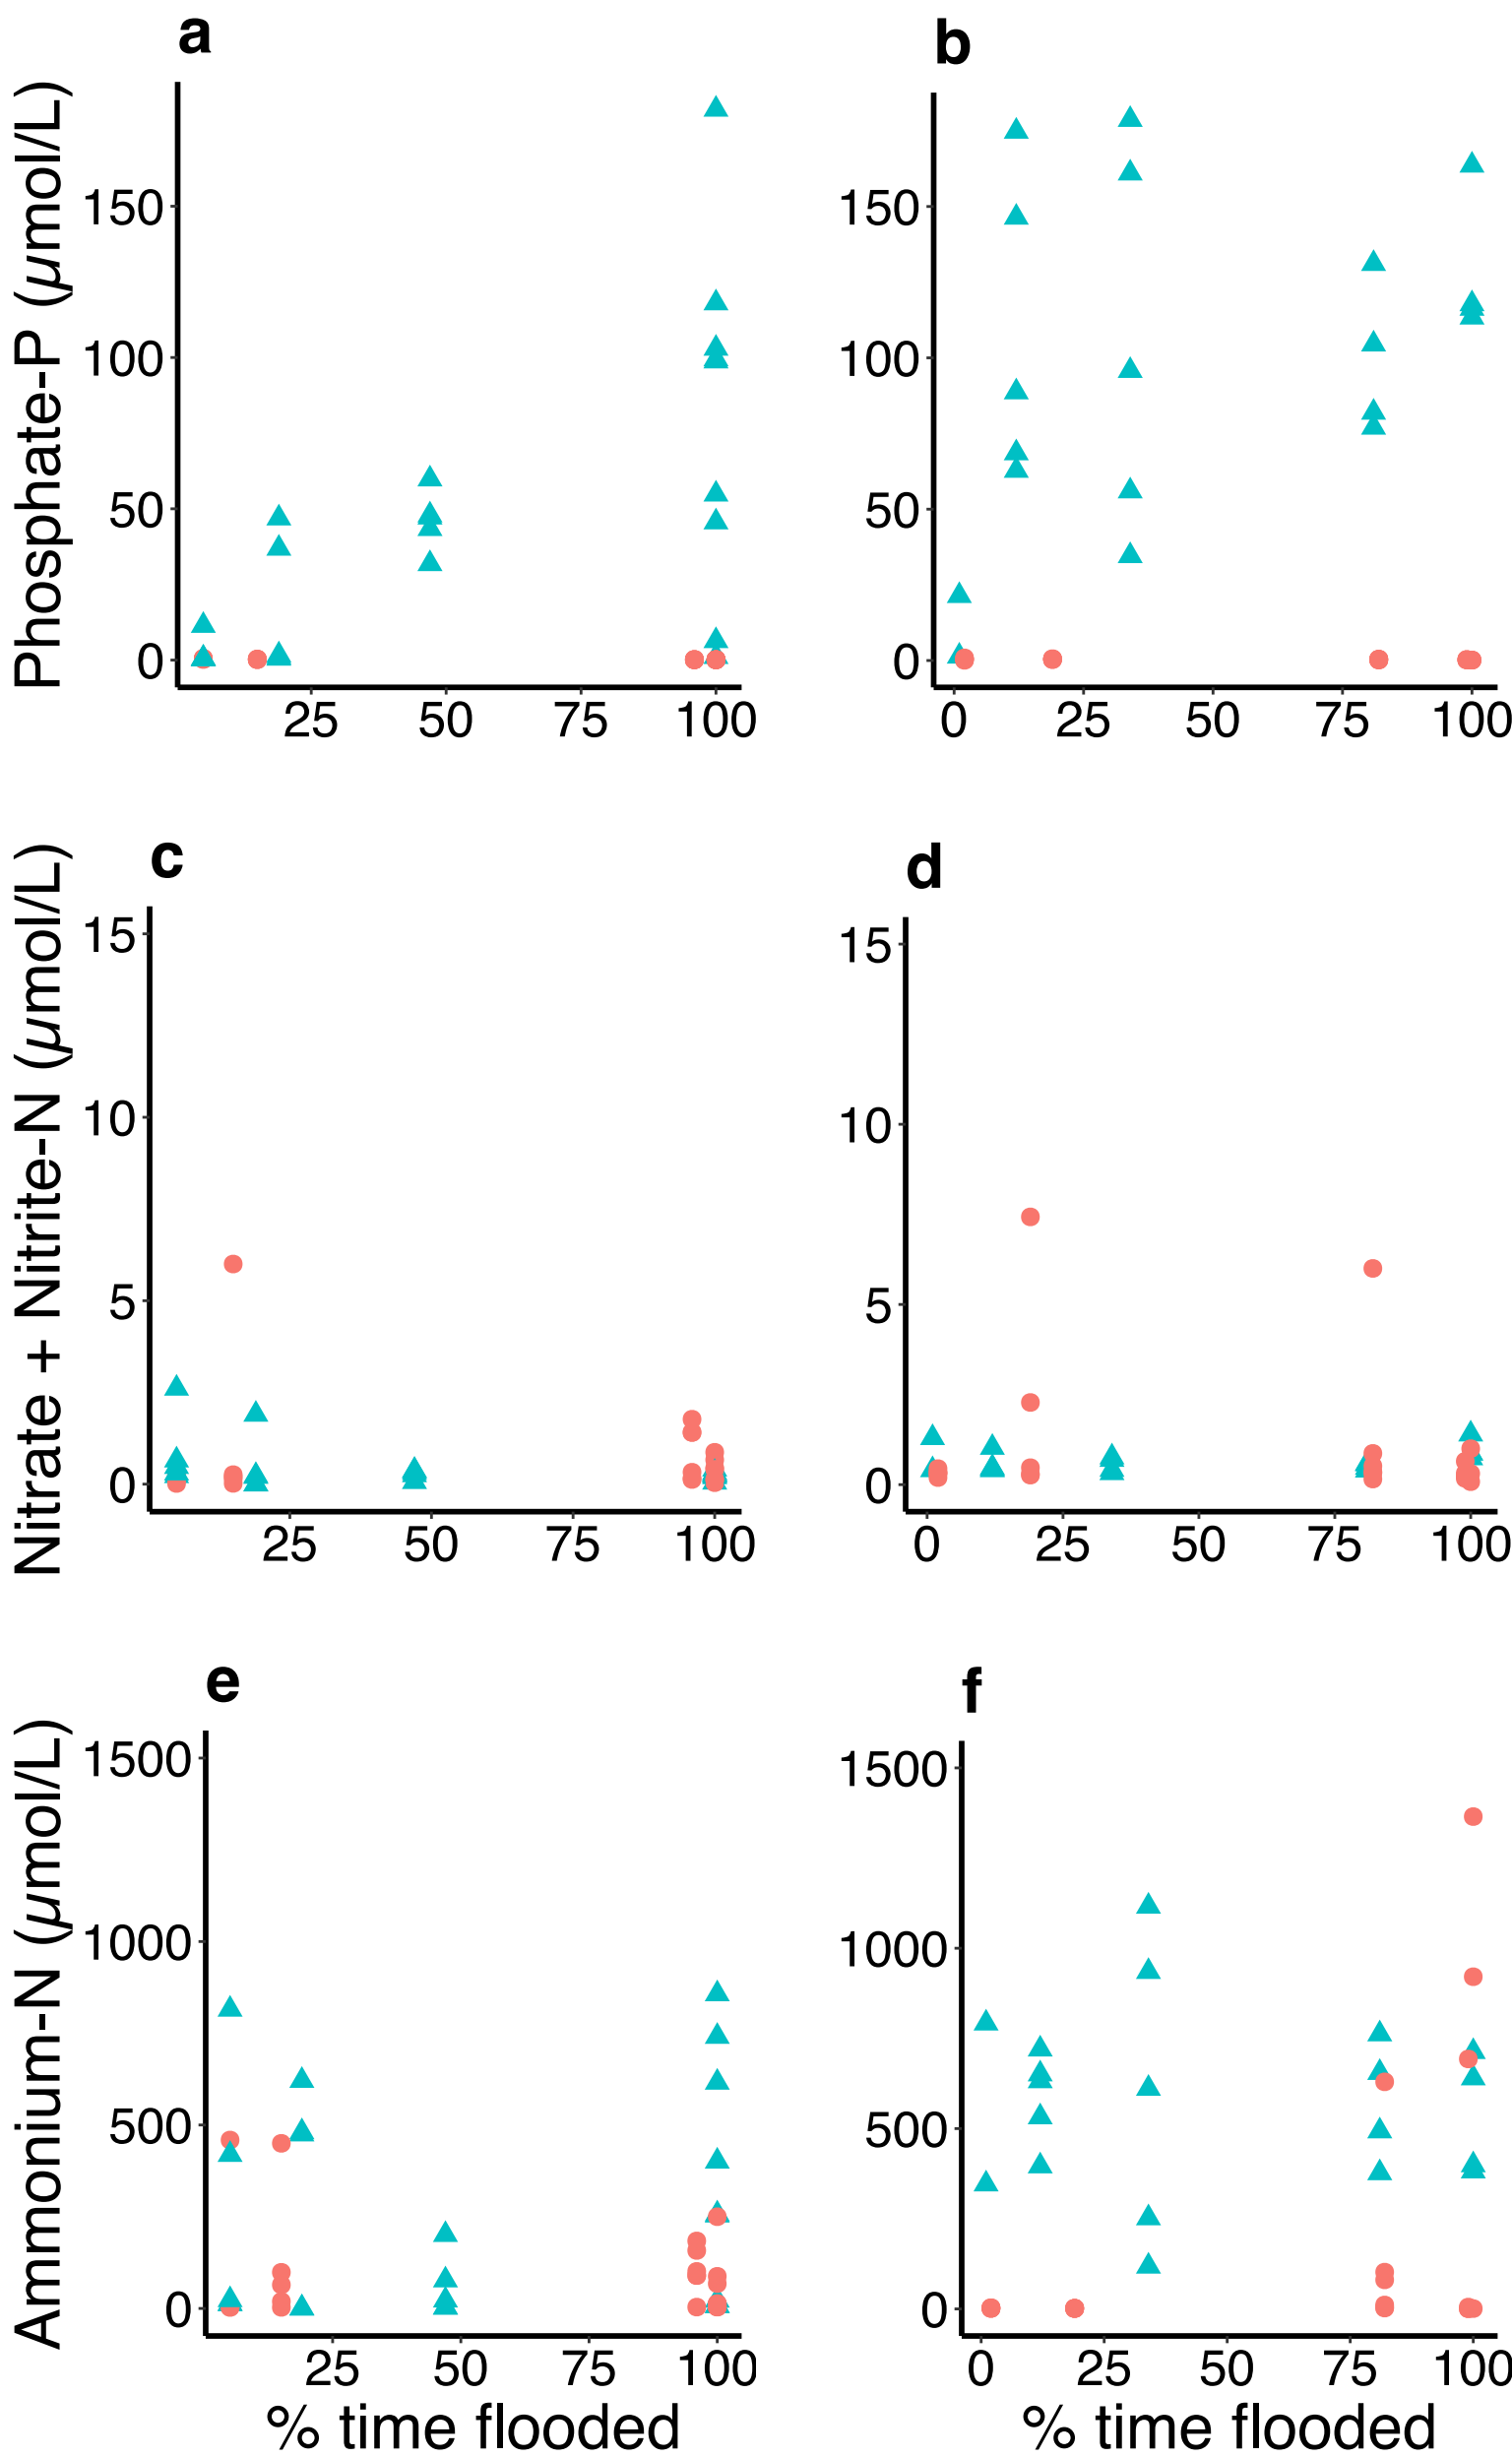

Supplement: s1 [file s1]
